# Supplementary material for: The effect of slab touchdown on anticrack arrest in propagation saw tests
Source: Copernicus journal article supplement (doi:10.5194/nhess-2024-122), 2024-08-08
Supplement: Supplementary file [file nhess-2024-122-RC1-supplement.pdf]

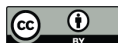

# The effect of slab touchdown on anticrack arrest in propagation saw tests

Philipp L. Rosendahl<sup>1</sup>, Johannes Schneider<sup>1</sup>, Grégoire Bobillier<sup>2</sup>, Florian Rheinschmidt<sup>1</sup>, Bastian Bergfeld<sup>2</sup>, Alec van Herwijnen<sup>2</sup>, and Philipp Weißgraeber<sup>3</sup>

<sup>1</sup>Technical University of Darmstadt, Institute of Structural Mechanics and Design, Germany

<sup>2</sup>WSL Institute for Snow and Avalanche Research SLF, Davos, Switzerland

<sup>3</sup>University of Rostock, Chair of Lightweight Design, Germany

**Correspondence:** Philipp Weißgraeber (philipp.weissgraeber@uni-rostock.de)

**Abstract.** Understanding crack phenomena in the snowpack and their role in avalanche formation is imperative for hazard prediction and mitigation. Many studies have explored how structural properties of snow contribute to the initial instability of the snowpack, focusing particularly on failure initiation within weak snow layers and the onset of crack propagation. This work addresses the subsequent stage, the effect of slab touchdown after weak layer failure in mixed-mode loading (compressive anticrack (mode I) and shear (mode II) loading). Here we show that slab touchdown reduces the energy release rate, potentially leading to crack arrest, even in static considerations. This finding challenges the notion that dynamic properties of snow layers and spatial snowpack changes alone dictate arrest, highlighting the critical role of mechanical interactions between the slab, weak layer, and base layer. By integrating these findings into the broader context of snowpack stability analysis, we contribute to a more nuanced understanding of avalanche initiation mechanisms. By offering a comprehensive model that can be applied in diverse geophysical settings (<https://github.com/2phi/weac>), this work extends the scope of avalanche science, promising new strategies for hazard assessment and mitigation.

## 15 1 Introduction

Understanding the stability and behavior of anticracks in weak snowpack layers is critical for avalanche hazard evaluation (Schweizer et al., 2003; van Herwijnen and Jamieson, 2005; Heierli and Zaiser, 2008). The propagation saw test (PST) has proven to be a useful field test to assess the stability of such cracks as a precursor to avalanche release (van Herwijnen and Jamieson, 2005; Gauthier and Jamieson, 2006; Sigrist et al., 2006). PST results serve as a proxy for the potential of weak layer cracks to propagate over large areas (Simenhois and Birkeland, 2009; Ross and Jamieson, 2012).



The potential of a crack to expand over a large area is decisive for the size of avalanches and thus the corresponding danger level. The propagation potential has been subject to numerous investigations (Reuter and Schweizer, 2012; Gauthier and Jamieson, 2006, 2008; Schweizer et al., 2014a, 2016; Birkeland et al., 2014). Experimental studies show that crack propagation behavior is greatly affected by the properties of the snowpack. Specifically, the thickness and density of the overlying slab increase its stiffness, thus favoring full propagation and accordingly large avalanches (van Herwijnen and Jamieson, 2007). Experimental data further reveals that after the onset of crack propagation, a crack may arrest again after a certain distance (Bair et al., 2014; Bergfeld et al., 2023b)). Numerical investigations underline the influence of snowpack properties and further emphasize the significant influence of weak layer properties for crack propagation potential (Gaume et al., 2015b; Bobillier et al., 2024).

Using appropriate mechanical models, it is possible to determine the weak layer fracture toughness by analyzing the critical crack length at which cracks first become unstable (Schweizer et al., 2011; van Herwijnen et al., 2016; Rosendahl et al., 2019a; Rosendahl and Weißgraeber, 2020a; Weißgraeber and Rosendahl, 2023). When cracks become unstable, they either fully propagate through the isolated PST block (END), trigger slab failure and arrest as a consequence (SF), or arrest without triggering slab failure (ARR) (Gauthier and Jamieson, 2006; Benedetti et al., 2019; Bergfeld et al., 2023a). To discuss the dynamic behavior of a slab and weak layer system Siron et al. (2023) have proposed a variational approach and discussed the systems properties in comparison to the classical dynamic solution of Heierli (2005).

As the crack length increases, the system undergoes different states. When cracks are short, the slab is partially supported by the intact part of the weak layer and partially unsupported. At a certain crack length, the outermost corner of the slab comes into contact with the collapsed weak layer. As the crack continues to grow, an increasing portion of the slab is supported by the collapsed weak layer, a decreasing portion is supported by the uncollapsed weak layer, and in between the slab is unsupported. This unsupported slab length, sometimes called the bridging length, has been studied by Heierli et al. (2008), Bair et al. (2014) and Benedetti et al. (2019) by using simplified mechanical models of slab deformation. While these contributions provided insights to fundamental properties and allowed for the comparison to experimental results, e.g., Bergfeld et al. (2021, 2023b), they do not provide a comprehensive explanation of the physical mechanisms underlying crack propagation and arrest. This knowledge gap highlights the need for a mechanical model that incorporates slab touchdown and can explain the physical behavior of crack propagation or arrest.

Here, we propose a closed-form analytical model for the static response of all phases of propagation saw tests. For this purpose, we follow Weißgraeber and Rosendahl (2023) and model the slab as a beam composed of an arbitrary number of layers resting on an elastic foundation representing the weak layer. By incorporating the consideration of slab touchdown, we aim to provide an understanding of the micromechanical and energy processes that dictate the behavior of weak layer cracks under varying conditions. The model provides deformations, stresses, and mixed-mode energy release rates of weak layer cracks.

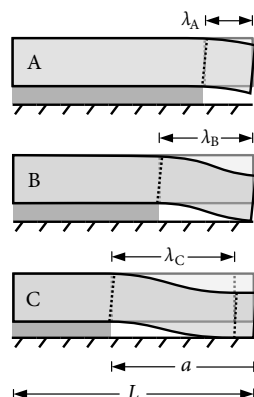

**Figure 1.** Three stages of a propagation saw test with total length  $L$  and crack length  $a$ . For short cracks, the slab is partially unsupported and has a free end (A). The length of the unsupported segment is denoted  $\lambda$  and, in this stage, equals the crack length  $\lambda_A = a$ . At a certain crack length, the end of the unsupported slab comes into contact with the collapsed weak layer (B). This adds support to the slab but allows it to rotate freely. The length of the unsupported segment and the crack length are equal  $\lambda_B = a$ . As the crack continues to grow, more of the slab is in contact with the collapsed weak layer (C). This adds an additional rotational constraint to the right end of the unsupported slab segment. The length of the unsupported segment is smaller than the crack length  $\lambda_C < a$ .

## 2 Methods

Slab touchdown in propagation saw tests represents a nonlinear mechanical contact problem because changing boundary conditions introduce structural nonlinearities into otherwise linear systems. By splitting the analysis of the different stages of a propagation saw test into subsystems of initially unknown length, the subsystems remain linear and closed-form solutions can be developed.

Three different stages can occur in the considered system of the propagation saw test as shown in Figure 1. Stage A denotes short crack lengths where the slab under which the weak layer has been removed hangs freely. Stage B denotes conformations where cracks are long enough that the slab is in contact with the collapsed weak layer, but short enough that it is supported only at its outermost corner. At this stage, the slab is free to rotate at the point of contact. In stage C, the slab has a wider contact area with the collapsed weak layer, so that the part in contact can no longer rotate freely, but is restrained by the extended contact to the substratum.

### 2.1 Governing equations

Critical to the mechanical behavior of the touchdown problem are the deformations of the unsupported segment, whose length is called  $\lambda$  (Figure 1). To model its structural response, we follow Weißgraeber and Rosendahl (2023) and describe the slab as a beam subject to the First-Order Shear Theory composed of an arbitrary number of layers by using theories developed for the

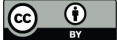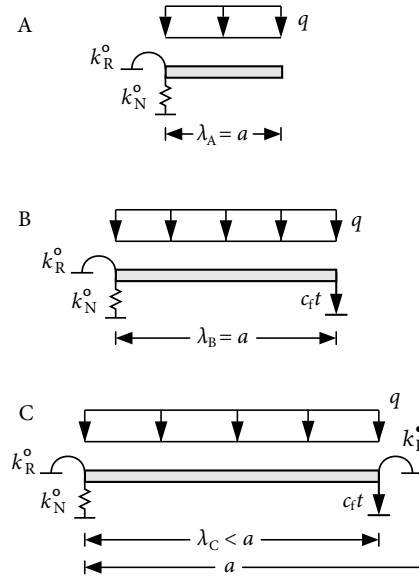

**Figure 2.** Boundary conditions of the unsupported segment. Reactions by the slab resting on the intact weak layer (◦) are represented by linear and rotational springs with stiffnesses  $k_N^{\circ}$  and  $k_R^{\circ}$ , respectively. Deflections are limited to a fraction  $f_c t$  of the weak layer thickness. Moments introduced by the slab resting on the collapsed weak layer (●) are represented by rotational springs of stiffness  $k_R^{\bullet}$ .

analysis of layered composite materials Reddy (2003). The vertical deflection of the slab's midplane is given by

$$w_0(x) = c_1 + c_2 x + c_3 x^2 + c_4 x^3 - \frac{A_{11}}{24(B_{11}^2 - A_{11}D_{11})} q x^4, \quad (1)$$

where  $q$  is a line load representing the beam's weight and  $A_{11}$ ,  $B_{11}$ , and  $D_{11}$  are the beam's extension, bending–extension coupling, and bending stiffnesses, respectively (Weißgraeber and Rosendahl, 2023). Derivatives of the mid-plane deflection describe the cross-section rotation

$$\psi(x) = \frac{B_{11}^2 - A_{11}D_{11}}{\kappa A_{55}A_{11}} w_0'''(x) - w_0'(x), \quad (2)$$

75 where  $\kappa A_{55}$  is the beam's shear stiffness. The boundary conditions determining the constants  $c_1$ ,  $c_2$ ,  $c_3$ , and  $c_4$  in Equation (1) are illustrated in Figure 2.

Reaction forces introduced by the slab resting on the intact weak layer (left end in Figure 2) are represented by linear and rotational springs with stiffnesses  $k_N^{\circ}$  and  $k_R^{\circ}$ , respectively, where the superscript ◦ denotes the intact weak layer. With the coordinate origin at the segment's left end, the corresponding boundary conditions in all stages are

$$80 \quad M(x=0) = k_R^{\circ} \psi(x=0), \quad (3a)$$

$$V(x=0) = k_N^{\circ} w_0(x=0), \quad (3b)$$

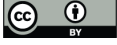

where  $M$  and  $V$  are bending moment and vertical section force,  $\psi$  is the cross-sectional rotation of the slab, and  $w$  is its vertical deflection. In stage A, the slab's right end hangs freely, i.e.,

$$M(x = \lambda_A) = V(x = \lambda_A) = 0. \quad (4)$$

85 In stage B, it is still free to rotate but vertical displacements are limited to the collapsed height of the weak layer. The fractional reduction of the weak layer thickness  $t$  is expressed by the collapse factor  $f_c \in [0, 1)$ . The corresponding boundary conditions are

$$M(x = \lambda_B) = 0, \quad (5a)$$

$$w_0(x = \lambda_B) = f_c t. \quad (5b)$$

90 In stage C, the unsupported segment experiences additional reaction moments from the part of the slab that is in contact with the collapsed weak layer (right end in Figure 2). This is represented by a spring with rotational stiffness  $k_R^\bullet$ , where the superscript  $\bullet$  denotes the collapsed weak layer. The associated boundary conditions are

$$M(x = \lambda_C) = k_R^\bullet \psi(x = 0), \quad (6a)$$

$$w_0(x = \lambda_C) = f_c t. \quad (6b)$$

95 The magnitudes of the stiffnesses  $k_N^\circ$ ,  $k_R^\circ$ , and  $k_R^\bullet$  are determined using the principle of virtual forces. For this purpose, we apply a unit vertical force or a unit bending moment to a slab resting on an elastic foundation as modeled by Weißgraeber and Rosendahl (2023). The foundation represents the intact or collapsed weak layer. The elastic response is then captured by the reciprocals of the corresponding displacements

$$k_N = \bar{1}/w_0, \quad (7a)$$

100  $k_R = \bar{1}/\psi. \quad (7b)$

where  $\bar{1}$  denotes a virtual unit load.

## 2.2 Stage discrimination

The key to linearizing the otherwise nonlinear contact problem is knowing the crack lengths at which the system changes configurations from stage A to B and from stage B to C (Figure 1). The transition length  $a_{AB}$  between A and B corresponds to the crack length at which the maximum deflection of the slab is equal to the collapsed height of the weak layer. Solving Equation (1) for the boundary conditions of stage A, Equations (3) and (4), with the additional constraint  $w_0(a_{AB}) = f_c t$ , yields the polynomial of 4th order in  $a_{AB}$ :

$$0 = \frac{a_{AB}^4}{8K_0} + \frac{a_{AB}^3}{2k_R^\circ} + \frac{a_{AB}^2}{2\kappa A_{55}} + \frac{a_{AB}}{k_N^\circ} - \frac{f_c t}{q}, \quad (8)$$

where  $K_0 = D_{11} - B_{11}^2 A_{11}^{-1}$ . The smallest positive real root of Equation (8) is the transition length  $a_{AB}$ .



- 110 The transition between B and C occurs at  $w'_0(a_{BC}) = 0$ , which marks the point at which the free end can no longer rotate freely and the contact area between slab and collapsed weak layer starts to increase. Using this condition together with the boundary conditions of stage B, Equations (3) and (5), yields a polynomial of 6th order in  $a_{BC}$

$$\begin{aligned}
 0 = & a_{BC}^6 \kappa^2 A_{55}^2 k_R^\circ k_N^\circ q \\
 & + a_{BC}^5 K_0 \kappa^2 A_{55}^2 k_N^\circ 6q \\
 & + a_{BC}^4 K_0 \kappa A_{55} k_R^\circ k_N^\circ 30q \\
 & + a_{BC}^3 K_0 (2\kappa^2 A_{55}^2 k_R^\circ + 3K_0 \kappa A_{55} k_N^\circ) 24q \\
 & + a_{BC}^2 K_0 (q K_0 (\kappa A_{55} + k_R^\circ k_N^\circ) - \kappa A_{55})^2 k_R^\circ k_N^\circ 72 f_c t \\
 & + a_{BC} K_0^2 \kappa A_{55} 144 (k_R^\circ q - \kappa A_{55} k_N^\circ f_c t) \\
 & - K_0^2 \kappa A_{55} k_R^\circ k_N^\circ 144 f_c t.
 \end{aligned} \tag{9}$$

- 115 The smallest positive real root of Equation (9) corresponds to the transition length  $a_{BC}$ .

While the length of the free segment  $\lambda$  equals the crack length  $a$  in stages A and B, in stage C its length  $\lambda_C < a$  is initially unknown. Using the boundary conditions of stage C, Equations (3) and (6), yields a polynomial of 6th order in  $\lambda_C$

$$\begin{aligned}
 0 = & \lambda_C^6 \kappa^2 A_{55}^2 k_R^\circ k_N^\circ q \\
 & + \lambda_C^5 \kappa A_{55} k_N^\circ (K_0 \kappa A_{55} + k_R^\bullet k_R^\bullet) 6q \\
 & + \lambda_C^4 K_0 \kappa A_{55} k_N^\circ (k_R^\circ + k_R^\bullet) 30q \\
 & + \lambda_C^3 K_0 (2\kappa^2 A_{55}^2 k_R^\circ + 3K_0 \kappa A_{55} k_N^\circ + 3k_R^\circ k_N^\circ k_R^\bullet) 24q \\
 & + \lambda_C^2 72 K_0 \left( q K_0 (\kappa^2 A_{55}^2 + k_N^\circ (k_R^\circ + k_R^\bullet)) \right. \\
 & \quad \left. + \kappa A_{55} k_R^\circ (2k_R^\bullet q - \kappa A_{55} k_N^\circ f_c t) \right) \\
 & + \lambda_C K_0 \kappa A_{55} 144 \left( q K_0 (k_R^\circ + k_R^\bullet) \right. \\
 & \quad \left. - k_N^\circ f_c t (K_0 \kappa A_{55} + k_R^\circ k_R^\bullet) \right) \\
 & - K_0^2 \kappa A_{55} k_R^\circ k_N^\circ k_R^\bullet 144 f_c t.
 \end{aligned} \tag{10}$$

- 120 Like before, the smallest positive real root of this equation provides the length of the unsupported segment  $\lambda_C$  in stage C.

### 2.3 Energy release rate

The elastic foundation representing the weak layer constitutes a so-called weak interface (Goland and Reissner, 1944; Lenci, 2001; Stein et al., 2015). In such weak interface models cracks are modeled by removing the elastic foundation. The corresponding energy release rate is given by

$$125 \quad \mathcal{G}(a) = -\frac{\partial \Pi(a)}{\partial a} = \frac{\sigma(a)^2}{2k_n} + \frac{\tau(a)^2}{2k_t}, \tag{11}$$



**Table 1.** Slab layer nomenclature and properties.

| Layer      | Hand hardness index | Density $\rho$ (kg/m <sup>3</sup> ) | Young's modulus $E$ (MPa) | Poisson's ratio $\nu$ |
|------------|---------------------|-------------------------------------|---------------------------|-----------------------|
| Hard       | P                   | 350                                 | 93.8                      | 0.25                  |
| Medium     | 1F                  | 270                                 | 30.0                      | 0.25                  |
| Soft       | 4F                  | 180                                 | 5.0                       | 0.25                  |
| Weak layer | F–                  | 100                                 | 0.3                       | 0.25                  |

**Table 2.** Dimensions and material properties.

| Property                             | Symbol   | Value   |
|--------------------------------------|----------|---------|
| Total length of PST blocks           | $l$      | 5 m     |
| Total slab thickness                 | $h$      | 36 cm   |
| weak layer thickness                 | $t$      | 1 cm    |
| Young's modulus weak layer           | $E_{wl}$ | 0.3 MPa |
| Young's modulus collapsed weak layer | $E_c$    | 1.5 MPa |
| Poisson's ratio                      | $\nu$    | 0.25    |

where  $a$  is the crack length,  $\Pi(a)$  the total potential energy,  $\sigma(a)$  and  $\tau(a)$  are the weak layer's normal and shear stresses at the crack tip, and  $k_n$  and  $k_t$  are the weak layer's normal and shear stiffnesses (Krenk, 1992; Lenci, 2001).

### 3 Study design

#### 3.1 Modeling propagation saw tests

130 We use slabs composed of three layers proposed as schematic hardness profiles by Schweizer and Wiesinger (2001), that are  
 composed of soft, medium, and hard snow as benchmark slab configurations (Fig. 3). Assuming bonded slabs, we consider  
 densities of  $\rho = 350, 270,$  and  $180 \text{ kg/m}^3$  for hard, medium, and soft snow layers with hand hardness indices **pencil (P),**  
**four fingers (4F),** and **one finger (1F),** respectively. From slab densities, we calculate the Young's modulus using the density-  
 parametrization developed by Gerling et al. (2017) using acoustic wave propagation experiments and improved by Bergfeld  
 135 et al. (2023b) using full-field displacement measurements

$$E_{sl}(\rho) = E_0 \left( \frac{\rho}{\rho_0} \right)^\gamma, \quad (12)$$

where  $\gamma = 4.4$  controls density scaling (Bergfeld et al., 2023b), and  $E_0 = 6.5 \cdot 10^3 \text{ MPa}$  and  $\rho_0 = 917 \text{ kg/m}^3$  are Young's modulus and density of ice (Northwood, 1947; Mellor and Cole, 1983; Moslet, 2007). Each slab layer is 12 cm thick and their

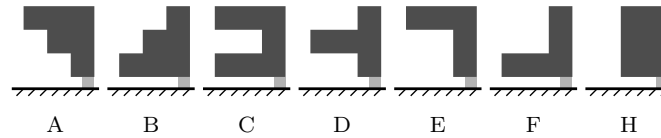

**Figure 3.** Benchmark snow profiles. Material properties of hard, medium, and soft slab layers (dark) and the weak layer (light) are given in Table 1. The weak layer is 1 cm thick and the slab layers have a thickness of 12 cm each.

individual material properties are given in Table 1. With reference to Jamieson and Schweizer (2000), who report weak layer  
 140 thickness between 0.2 and 3 cm, we assume a weak layer thickness of  $t = 1$  cm. Following density measurements of surface  
 hoar layers by Föhn (2001) who reports densities i) between 44 and 215 kg/m<sup>3</sup> with a mean of 102.5 kg/m<sup>3</sup> and ii) between  
 75 and 252 kg/m<sup>3</sup> with a mean of 132.4 kg/m<sup>3</sup> using two different measurement techniques, we assume a weak layer density  
 of  $\rho_{wl} = 100$  kg/m<sup>3</sup>, and a Young's modulus of  $E_{wl} = 0.3$  MPa (Bergfeld et al., 2023b). All parameters are summarized in  
 Table 2.

### 145 3.2 Finite-element reference model

To validate the present model, in particular with respect to different slab layerings, we compare the present analytical solution  
 to finite element analyses (FEA) using Abaqus 2020 (Simulia (Dassault Systèmes), France). The finite element model is  
 assembled from individual layers with unit out-of-plane width. Each layer is discretized using at least 10 eight-node biquadratic  
 plane-strain continuum elements with reduced integration through its thickness. The lowest layer corresponds to the weak layer.  
 150 The lower edge of this layer is clamped, so that no nodal displacements or rotations can occur. weak layer cracks are introduced  
 by removing all weak layer elements on the crack length  $a$  over the thickness  $f_c t$  and defining a node-to-surface contact between  
 slab and the collapsed weak layer. The mesh is refined towards stress concentrations such as crack tips and mesh convergence  
 has been controlled carefully (Rosendahl and Weißgraeber, 2020a). The weight of the snowpack is introduced by providing the  
 gravitational acceleration  $g$  and assigning each layer its corresponding density  $\rho$ . Boundary conditions are free ends. In the FE  
 155 model, the energy release rate of weak layer cracks

$$\mathcal{G}_{FE}(a) = -\frac{\Pi(a + \Delta a) - \Pi(a - \Delta a)}{2\Delta a}, \quad (13)$$

is computed using the central difference quotient to approximate the first derivative of the total potential  $\Pi$  with respect to  
 $a$ . The crack increment  $\Delta a$  corresponds to the element size and could be increased twofold or threefold without impacting  
 computed values of  $\mathcal{G}_{FE}(a)$ .

### 160 3.3 Discrete-element reference model

We use a three-dimensional discrete-element-method (DEM) model in PFC3D (v5) (Itasca Software, USA) to validate the  
 present model with respect to weak layer stresses and the influence of slope angle. The DEM model is established consists  
 of three layers: a rigid basal layer, a transversely isotropic weak layer, similar to layers of surface hoar or facets, and a dense



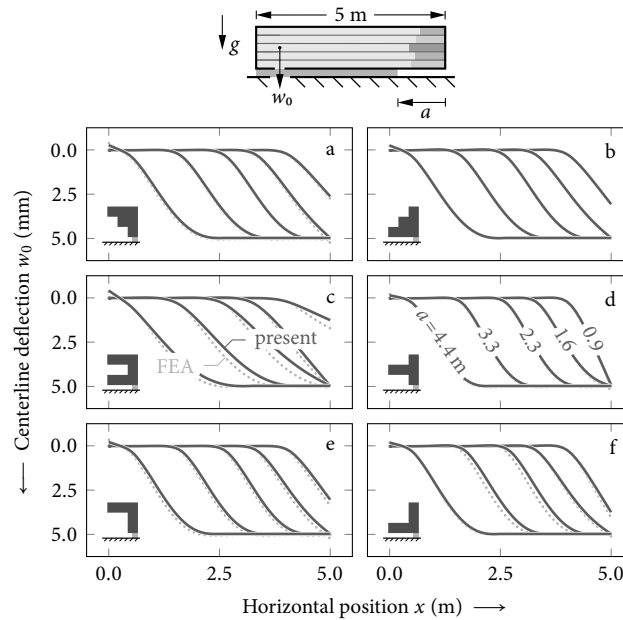

**Figure 4.** Deformations within PST configurations for the considered benchmark snow profiles (Figure 3) for different crack lengths ( $a = 0.9\text{ m}, 1.6\text{ m}, 3.3\text{ m}$  and  $4.4\text{ m}$ ). The deflections  $w_0$  as obtained from the present model (solid lines) and the FEA reference solution (dotted lines) are shown. The weak layer is assumed to collapse to 50 % of its initial thickness ( $f_c = 0.5$ ).

and uniform slab layer. The basal layer is composed of a single particle layer. The weak layer is created by cohesive ballistic deposition resulting in a porosity of 80 % with a layer thickness of 20 mm. The slab layer is generated by cohesionless ballistic deposition and generated a uniform slab of 40 cm thickness. The slab has a macroscopic density  $\rho = 250\text{ kg/m}^3$ , a Young's modulus  $E_{sl} = 5.2\text{ MPa}$ , and a Poisson ratio  $\nu = 0.3$ . The weak layer has a density  $\rho = 110\text{ kg/m}^3$  and Young's modulus  $E_{wl} = 1\text{ MPa}$ . The simulated PST is 7 m long and 30 cm wide. To evaluate the third touchdown stage (C), the weak layer is numerically removed over 3.5 m (crack length), creating a 'collapse' height of 20 mm. For the complete DEM PST model description, please refer to Bobillier et al. (2021).

#### 4 Results and discussion

Using the present analytical model and the numerical reference models (FEA and DEM) we investigate different configuration of propagation saw test experiments. We systematically study deformations, stresses, and mixed-mode energy release rates of weak layer cracks. The sensitivity regarding the governing parameters is studied and a comparison to experimental results is provided.



#### 4.1 Slab layering and displacements

The model is used to study the deformations of PST configurations at different crack lengths. The benchmark snow profiles of layered slabs as shown in Figure 3 are used. Figure 4 shows propagation saw tests with  $l = 5$  m length, and different crack lengths  $a = 0.9$  m, 1.6 m, 3.3 m and 4.4 m. Following the high-speed photography experiments by Van Herwijnen and Jamieson (2005) we assumed that the weak layer collapses to 50 % of its initial height, i.e.,  $f_c = 0.5$ . The solution of the present modeled are compared to FEA results for comparison.

When  $a = 0.9$  m, all profiles are in stage A and none of the slabs are in contact with the collapsed weak layer (Figure 4a–f). Hence, we observe a free bending deformation of the slabs with the different profiles. At a crack length of  $a = 1.6$  m, touchdown is observed in all profiles ( $w = f_c t$ ). However, the results show that their right ends can still freely rotate ( $w'_0 > 0$ ), indicating that they are in stage B (Figure 4a–f). With a further increase of the crack length to  $a = 2.3$  m, only profile C, which has the highest bending stiffness, remains in stage B (Figure 4c); all other profiles are in stage C (Figure 4a,b,d–f). At  $a = 4.4$  m the crack is almost as long as the total length of the PST. Here, we observed negative (lifting) displacements ( $w < 0$ ) at the left end (Figure 4a–f).

The results show a pronounced effect of the different snow profiles on the deformations in the considered PST configurations. Profiles with lower bending stiffness have higher bending induced inclinations than profiles with high bending stiffness, c.f. compare profile C and profile D in Figure 4. The change of deformation behavior for different layerings also has an effect on the energy release rate. This has been discussed in detail in Weißgraeber and Rosendahl (2022), where also the effects of changed bending stiffness and the different mean densities are discussed in comparison. It is in line with field observations of increased snowpack stability when pronounced bridging, which is governed by slab bending and shear stiffness, was observed (Schweizer and Jamieson, 2003; Thumlert and Jamieson, 2014).

#### 4.2 Slope angle and weak layer stresses

In order to analyze the influence of the slope angle on weak layer stresses and slab displacements, we study different slope angles and compare the present model to the reference discrete-element model (DEM) described in section 3.3. We assume a homogeneous slab with macroscopic density  $\rho = 250.0$  kg/m<sup>3</sup>, Young's modulus  $E_{sl} = 5.2$  MPa, Poisson's ratio  $\nu = 0.3$ , thickness  $h = 40$  cm. Further a weak layer with a Young's modulus  $E_{wl} = 1.0$  MPa, thickness  $t = 20$  mm, and a collapse height  $f_c = 1.0$  is assumed. The geometry of the PST is defined by its total column length  $L = 7$  m, a unit out-of-plane width and the crack length  $a = 3.5$  m.

At the considered crack length a touchdown of the slab occurs despite the high collapse height factor of  $f_c = 1.0$ . As the free end of the slab still shows an inclination for all three considered angles, all solutions are in stage B, see Figure 5. The model also shows the effect of cut direction within a PST (upslope vs. downslope) that changes the magnitudes of the shear and normal stresses for the cases of  $\varphi = -35^\circ$  and  $\varphi = +35^\circ$ , as it is discussed, e.g., by Weißgraeber and Rosendahl (2023). Such insights allow to develop variations or improvements of propagation saw test experiments to improve the experimental

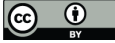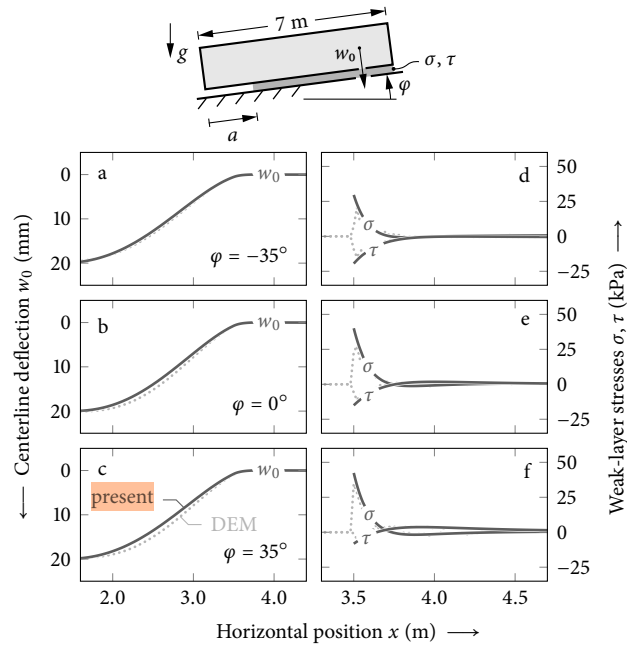

**Figure 5.** Model validation. Comparison of PST centerline deflections  $w_0$ , weak layer normal stresses  $\sigma$ , and weak layer shear stress  $\tau$  between present model (solid) and DEM reference solution (dotted). PSTs with homogeneous slabs  $H$  (Figure 3) of 7 m total length with  $a = 3.5$  m cuts are shown at slope angles  $\varphi = -35^\circ$ ,  $0^\circ$  and  $35^\circ$ , where negative slope angles are used to render down-slope cuts. The weak layer is assumed to collapse completely ( $f_c = 1.0$ ) from its initial thickness  $t = 20$  mm.

approach or to derive guidelines for effective experiments (van Herwijnen et al., 2016; Birkeland et al., 2019; Bergfeld et al., 2023a).

### 210 4.3 Effect of crack length

The transition from stage A to B to C is directly linked with the displacement field of the slab. The rotation of the left free end caused by slab bending changes before (stage A) and during its first touchdown (stage B). When more and more of the slab comes in contact with the collapsed weak layer, the boundary on the left side becomes vertical (stage C). The progression of the displacement field of a homogeneous slab observed for increasing crack lengths  $a$  is shown in Figure 6a.

215 Crack-tip loading increases with increasing crack length, which leads to a progressively increasing ERR in stage A ( $a < 1.2$  m). Initial contact with the collapsed weak layer at the transition from stage A to B causes a sharp decrease in ERR ( $a \approx 1.2$  m). This is caused by a reduced loading of the crack tip owing to the additional support of the slab. In stage B, the effect of added support remains present when the free end that rotated due to slab bending becomes vertical as the crack length increases. When the curvature of the unsupported segment changes its sign at the contact point, longer cracks cause an increase  
 220 in ERR once again. At stage C the slab has developed its full contact with the base and its unsupported length no longer

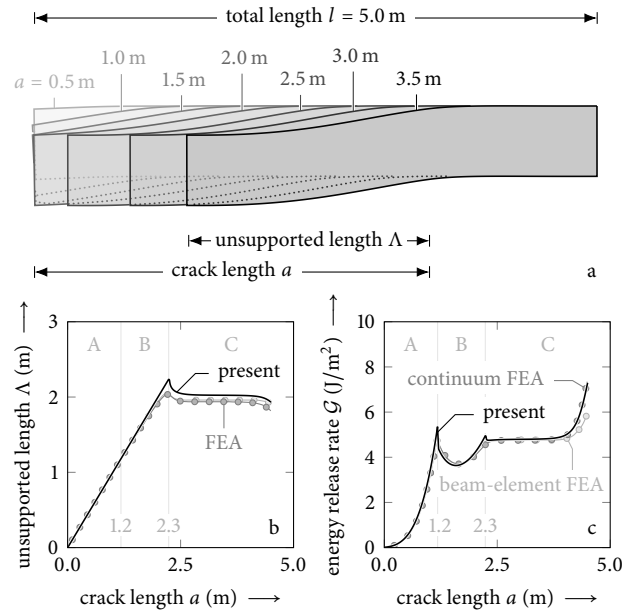

**Figure 6.** Evolution of the displacement field of a homogeneous slab in a propagation saw test with increasing crack length. The results of the present model are shown as a solid line. The results of the numerical reference model is shown in gray. Dark gray for the continuum FEA and light gray for the beam-element FEA.

increases ( $a > 2.3$  m). Therefore, the system reaches a steady state with a constant ERR until boundary effects at the right end become relevant. The evolution of the energy release rate (ERR) of weak layer cracks is shown in Figure 6c. The effect of boundaries on the ERR of PST was also discussed by Bair et al. (2014) within a numerical FEA study. They found that close (0.5 m to 1.0 m) to the end of a PST the ERR increased strongly, as also shown by the present model.

225 During stage A and B the unsupported length corresponds to the crack length. In stage C the effect of the touchdown, acting as a rotational constraint, reduces the unsupported length to less than the crack length. After the transition from stage B to stage C the unsupported length is almost constant until the rotational constraint at the uncut end of the PST reduces and leads to shorter unsupported lengths. Figure 6b shows the corresponding unsupported length  $\Lambda$  during the increase of the crack length in the PST.

230 Figure 6a shows that the effect of touchdown changes when more of the slab is resting on the collapsed weak layer. The slope of the center line changes significantly. At first touchdown the slab contacts the substratum at a higher angle and with further touchdown this angle reduces. This shows that a load transfer takes place and a smaller part of the weight load of the slab needs to be transferred through the weak layer, which limits the ERRs increase. This effect is nicely seen in Figure 6c. A local maximum of the ERR occurs at the first touchdown.

235 Then with further increase the ERR rises again until there is a steady state touchdown that results in a plateau value.



#### 4.4 Influence of PST geometry and material properties

To understand the effect of parameters like the PST geometry and material properties, we conducted a sensitivity analyses for seven relevant parameters: slab thickness  $h$ , homogeneous slab density  $\rho_{sl}$ , weak layer Young's modulus  $E_{wl}$ , weak layer thickness  $t$  and collapse factor  $f_c$ , slope angle  $\varphi$ , and scaling exponent  $\gamma$  for the elastic modulus parameterization in Equation (12).

240 For each case the dependence of the unsupported length and the energy release rate on the crack length are shown in Figure 7.

Slab thickness governs the bending stiffness of the slab and leads to significant changes in the unsupported length and the energy release rate. We considered slab thickness (Figure 7a and b) values of  $h = 24$  cm, 36 cm and 48 cm. For thicker slabs the amplitude of the unsupported length increases and the transition of the stages (A to B to C) occurs at higher crack lengths. Similarly, the energy release rate also increases with the slab thicknesses. In stage A and stage B the energy release rate has the same initial increase but as the transition to stage C occurs at higher crack lengths, higher values of the energy release rate are obtained.

The effect of the density of the slab is shown in Figure 7c and d. Changing the density increases the loading of the PST and, by the density parametrization of the Young's modulus, the stiffness also increases. The unsupported length (Figure 7c) increases with increasing density as the effect of increased stiffness dominates the change of the bending behavior of the slab. The maximal unsupported length (i.e., the transition from stage B to C) occurs at longer crack lengths, when the density and hence the stiffness increases. The change from stage A to B can be seen in the corresponding ERR diagram (Figure 7d) as the first local maxima. While the corresponding crack length at which this transition occurs, increases only slightly, the magnitude of the ERR peak increases greatly with increasing density. For the density of  $360 \text{ kg/m}^3$  the plateau of constant ERR is very short, as the boundary effect of increasing ERR near the end of the PST affects a larger part of the PST. Weißgraeber and Rosendahl (2022) discussed the effect of higher stiffness and increased weight loading of denser slabs by normalizing ERR for the average slab weight. They found that the two effects counteract each other, and mechanical modeling can help to understand which effect may dominate in a field experiment. This is of importance when new PST setups are developed, e.g. Birkeland et al. (2019).

In Figure 7e and f the effect of the weak layer Young's modulus  $E_{wl}$  is studied. When increasing this property the maximal unsupported length and the maximal energy release rate increases by a few percent. The maximum of the ERR occurs for slightly smaller crack lengths, when increasing the weak layer's Young's modulus. The weak layer thickness  $t$  (Figure 7g and h) has an effect on the compliance of the weak layer and the domain of energy release during collapse. Increasing the weak layer thickness, increases both the unsupported length and the energy release rates. A very similar effect is observed when the collapse factor  $f_c$  is changed (Figure 7i and j).

265 Changing the slope angle  $\varphi$  is analyzed in Figure 7k and l. For higher slope angles, the unsupported length increases, while the corresponding energy release rate decreases. At high slope angles, no clear plateau of the ERR is observed (Figure 7l). This can be attributed to the model not accounting for frictional sliding of touchdown segments, instead assuming full contact. The observation that this effect only occurs at very high slope angles confirms that the chosen modeling approach, which does not include frictional sliding, is sufficiently accurate for relevant slope angle regimes.

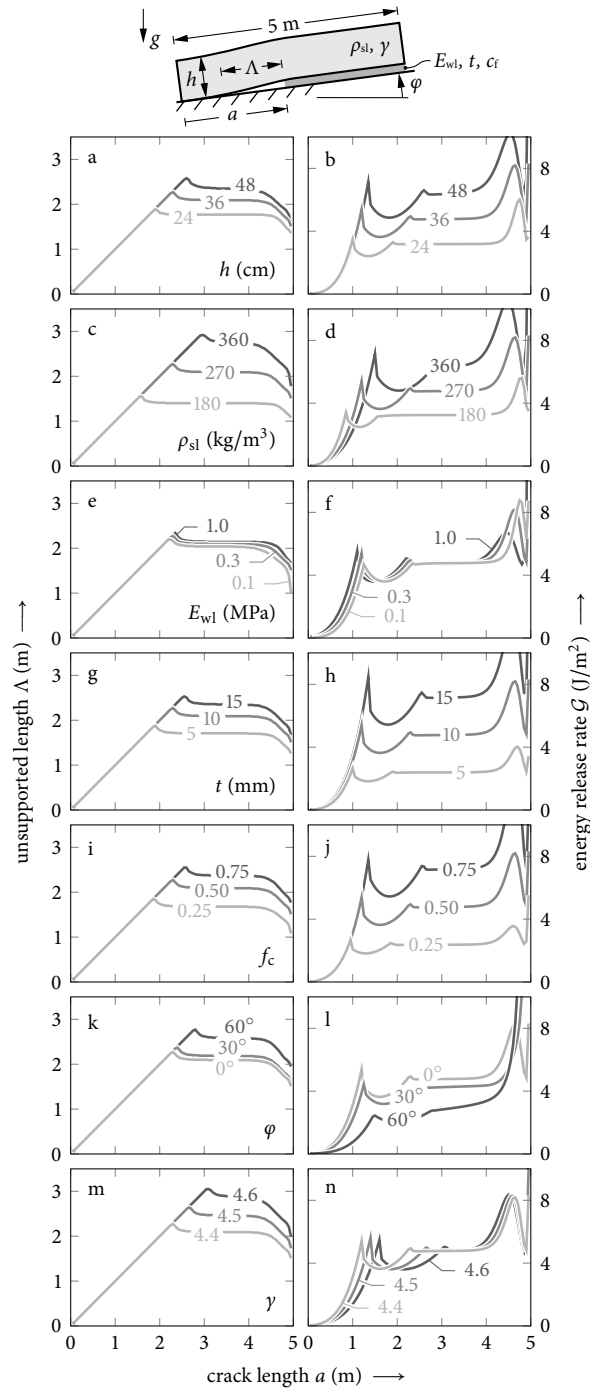

**Figure 7.** Influence of PST geometry and material properties on unsupported length  $\Lambda$  (left column) and energy release rate  $\mathcal{G}$  (right column): slab thickness  $h$ , density of the homogeneous slab  $\rho_{sl}$ , weak layer Young's modulus  $E_{wl}$ , thickness  $t$ , and collapse factor  $f_c$ , slope angle  $\varphi$ , and density scaling exponent  $\gamma$ , cf. Equation (12).

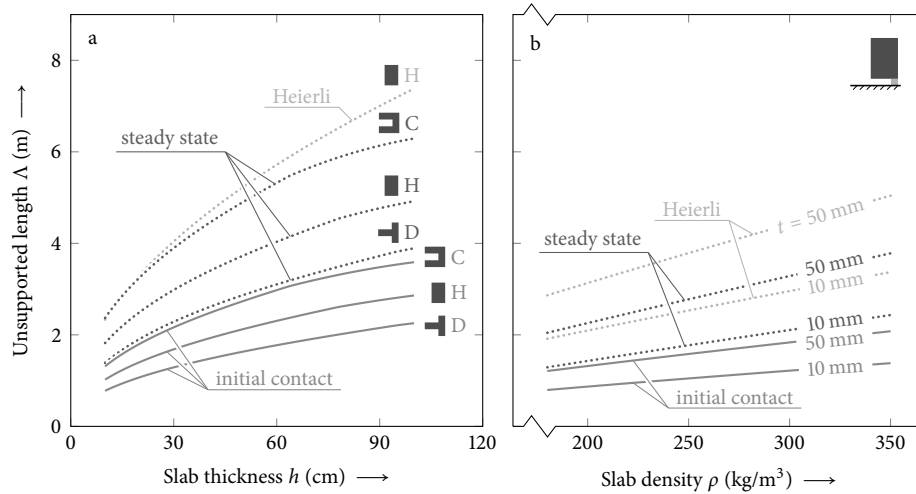

**Figure 8.** Analysis of the effect of slab and weak layer parameters on the unsupported lengths in propagation saw tests. a) Effect of slab thickness for different snow profiles. b) Effect of slab density and weak layer thickness. Both the unsupported length at first touchdown as well as the unsupported length of the steady state crack propagation in stage C are compared. The touchdown distance obtained using the model by Heierli (2005) as derived in Equation (14) is shown for comparison.

270 The scaling exponent  $\gamma$  in the density-parametrization of the Young's modulus Equation (12) was varied between 4.4 to 4.6 to study the sensitivity on this parameter. An increase of the scaling exponent changes the transition from stage B to C (Figure 7m) and from stage A to B (Figure 7n) to higher crack lengths. This increases the magnitude of the maximal unsupported lengths but the magnitudes of the energy release rate does not change.

#### 4.5 Touchdown distance

275 In Figure 8 the corresponding touchdown lengths as function of slab and weak layer properties is addressed. To this end, both the unsupported length at first touchdown of the slab (transition from stage A to B) as well as the touchdown length associated with the steady state energy release rate in stage C are compared. Figure 8a shows the effect of the total slab thickness on the touchdown lengths of a PST. Three different profiles are compared: a homogeneous slab, a stiff layered profile and a compliant layered profile (profiles H, C, D of Figure 3, respectively). A degressive increase of the touchdown length with increased slab  
 280 thickness is observed for all profiles. The stiffest profile shows the highest values of the initial contact touchdown length and the steady state touchdown length. The touchdown lengths of the stiff profile C are about 70% higher than those of the profile D. The results for the homogeneous slab lie in between the profiles C and D. The touchdown lengths of profile C are about 30% higher than those of the homogeneous slab. Both the effect of the layering and the effect of the total slab thickness highlight the great impact of the bending stiffness and layering on the touchdown length (Habermann et al., 2008; Weißgraeber and  
 285 Rosendahl, 2022).



In Figure 8b the results of a parametric variation of the slab density of a homogeneous slab are shown for two different weak layer thicknesses. The change of the density has a twofold effect as both the gravitational loading increases linearly and the stiffness of the slab increases with a power law due to the density parametrization Equation (12). The combined effect leads to an almost linear increase of the touchdown lengths with increased density of the slab. Increasing the weak layer thickness also significantly increases the touchdown lengths, as shown in Figure 8b for two different weak layer thickness values.

The parameter effects addressed in Figure 7 also show that the length associated with first touchdown and the unsupported length are strongly correlated, when governing parameters of slab or weak layer are changed. Within the parametric studies within this work we have observed that the ratio of the touchdown length of steady state conditions to the touchdown length of first touchdown shows only small variation with changes of parameters and typically lies between 1.6 to 1.8. This can be explained by the fact that both lengths are mainly dominated by the bending behavior of the slab-weak layer system.

We compare the results of the present model with the simplified model accounting for touchdown by Heierli (2005). Like our model, the Heierli model considered the stationary state and, thus, time-independence is assumed to simplify the differential equations. Heierli considers the transverse bending of thin plates using Euler-Bernoulli beam theory. Assuming the ends of the touchdown length to be slope-parallel ( $w'(0) = w'(\Lambda) = 0$ ), one end is displaced by the amount of crack settlement ( $w(\Lambda) = f_c t$ ), while the other end rests on the intact weak layer ( $w(0) = 0$ ). The solution of this boundary value problem can be rearranged to yield the steady-state touchdown distance

$$\Lambda_H = 2.331 \sqrt[4]{\frac{Eh^2 f_c t}{6\rho g (1 - \nu^2)}}, \quad (14)$$

where, in notation of the present model,  $h$  is the total thickness of the slab,  $\rho$  its average density, and  $g = 9.81 \text{ m/s}^2$  the earth's gravitational acceleration.

The touchdown lengths obtained with Equation (14) are shown in Figure 8a) and b) for comparison to the results of the present model. The touchdown lengths obtained from the Heierli model are always significantly longer than the touchdown lengths of the present model. Within the parameter studied here, a deviation by 34 % to 81 % is observed. The largest overestimation of the touchdown length by the Heierli model was observed for thick slabs and thin weak layers. The overestimation of the touchdown lengths is rooted in the assumptions of the Heierli model which uses the Euler-Bernoulli beam theory that does not account for shear deformation in the slab. Yet shear deformation are especially significant for thick slabs and relatively short crack lengths. Heierli further assumes the unsupported slab to be clamped left and right and thus neglects the compliance of the rested and bedded slab, respectively. He further neglects the compliance of the weak layer itself. This leads to a zero rotation which subsequently induces a much longer touchdown distance. As the Heierli solution also does not account for the layering of the slab, further deviation occurs. For the considered cases the Heierli solution overestimates the touchdown lengths by a factor of three, when layered configurations are considered. Other aspects and especially those of the crack dynamics of the Heierli model are discussed in detail in Siron et al. (2023).





#### 4.6 Discussion of the model

The present model for slab touchdown is based on the mechanical model for layered slabs by Weißgraeber and Rosendahl (2022) and solves the non-linear contact problem by introducing subsegments with linear behavior of initially unknown length, that are identified by finding the roots of polynomials of the touchdown length. The solution requires very low computational effort and allows for a solution within a few milliseconds on a standard desktop PC.

The present solution approach shares similarities with the approach used by Benedetti et al. (2019). They also proposed to use different stages (referred to as schemes) but the stages did not yield continuous transitions between the stages. Besides avoiding this limitation, the present model employs a more detailed representation of the slab allowing for shear, bending and extensional deformation by using the model of Weißgraeber and Rosendahl (2022), that also allows to consider effects of layering in the slab. Furthermore, the model allows to describe the conditions at the crack tip by providing the differential energy release rate. The model also accounts for the effect of the compliance of the weak layer, which has a strong effect on the accuracy of the stress and ERR results.

Validation has been performed by the comparison to the detailed FEM and DEM reference models. The comparison of the deflection for different crack lengths (Figure 4) shows that the very good agreement also covers the case of very long cracks in PSTs where a lifting deformation of the slab occurs. The results in Figure 6 for the energy release rate and for the unsupported crack length show a comparison to the non-linear FEA reference model. A very good agreement between the current model and the FE reference solutions is observed for both the unsupported crack length and the ERR. Both the deformation and stress results in the study of the effect of the slope angle Figure 5 show generally very good agreement, but also a typical limitation of weak interface models. The stresses near the crack tip are not resolved, as discussed in Krenk (1992); Rosendahl and Weißgraeber (2020b).

In the present model the stationary state of slab touchdown is considered and dynamic effects are not accounted for. For the start of crack propagation after reaching the critical cut length in a PST experiment, this is directly the case. During the PST experiment dynamic effects will certainly change the ERR, which is out of scope of this work. The observed effect of an ERR plateau however will not be affected by this, while of course the magnitudes of the plateau ERR will be influenced by the dynamic crack propagation and the resulting dynamic stress field around the moving crack tip Freund (1990). A detailed discussion of dynamic effects and the classical Heierli model is given by Siron et al. (2023). However, when crack arrests occur, the final arrested configuration is again a static state that is covered by the present model.

The present model assumes full contact and stress transfer when touchdown occurs and no frictional movement is considered. Since the extensional stiffness of the slab is much higher than the flexural stiffness, it is assumed, that the shear stresses in the weak layer that occur during touchdown do not exceed static friction. Then a full load transfer of shear stresses is possible. Due to the heterogeneous microstructure of the snow surface locking is facilitated the load transfer further.

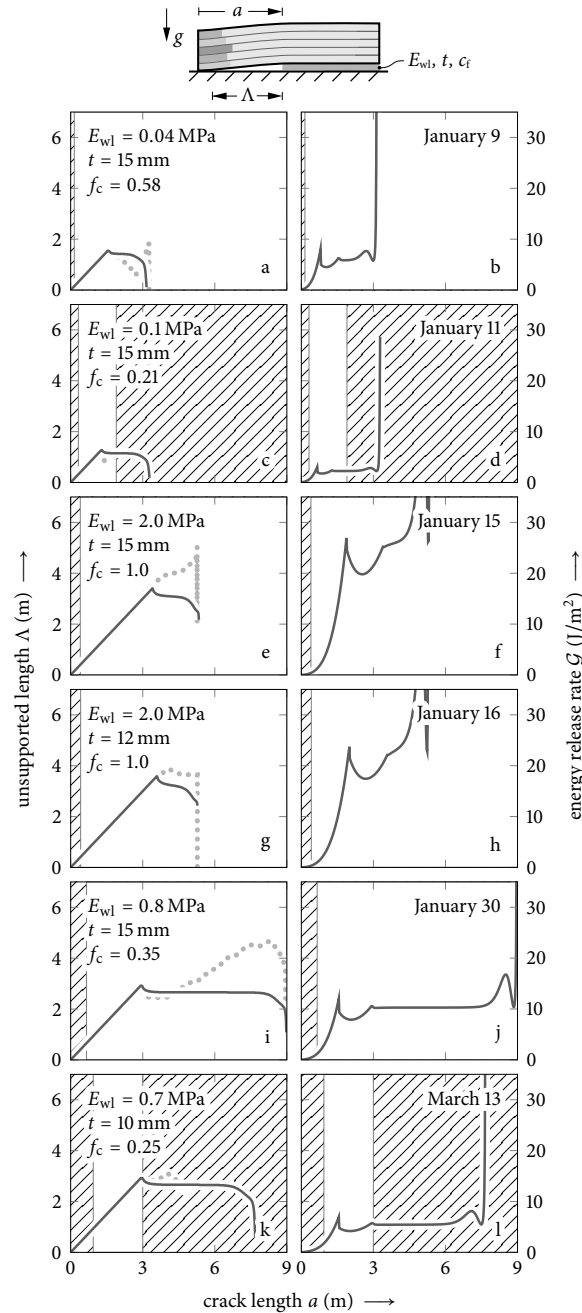

**Figure 9.** Crack propagation observed in PST experiments (Bergfeld et al., 2023a,b) of up to 9 m total length. White background corresponds to unstable propagation while the hatched background indicates manual cutting and crack arrest. The properties of the weak layer, which vary from January to March 2019 (elastic modulus  $E_{wl}$ , thickness  $t$ , and collapse fraction  $f_c$ ) were determined from a best fit of the measured (dotted) and modeled (solid lines) unsupported length  $\Lambda$  (left column). Energy release rates  $G$  at corresponding crack lengths  $a$  are given in the right column.

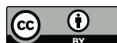

**Table 3.** Critical ( $\mathcal{G}_c$ ) and steady-state ( $\mathcal{G}_s$ ) energy release rates (ERR) in the PST experiments of 2019. Bergfeld et al. (2023b,a)

| Date   | PST result | Fracture toughness $\mathcal{G}_c$ | Steady-state ERR $\mathcal{G}_s$ | Ratio $\mathcal{G}_c/\mathcal{G}_s$ |
|--------|------------|------------------------------------|----------------------------------|-------------------------------------|
| Jan 9  | END        | 0.360                              | 5.9                              | 0.061                               |
| Jan 11 | ARR        | 0.592                              | 2.3                              | 0.257                               |
| Jan 15 | END        | 0.391                              | 25.0                             | 0.016                               |
| Jan 16 | END        | 0.353                              | 22.0                             | 0.016                               |
| Jan 30 | END        | 1.212                              | 10.3                             | 0.118                               |
| Mar 13 | ARR        | 1.770                              | 5.4                              | 0.328                               |

#### 4.7 Practical implications

We used the data reported by Bergfeld et al. (2023a,b) from up to 9 m long PSTs from January to March 2019 and identified data sets that allowed for unique identification of crack length and unsupported length. In this study they recorded the displacement of the slab using digital image correlation (DIC). From the obtained displacement fields the touchdown length can be retrieved and can be compared to the energy release rates obtained by use of the mechanical model from Weißgraeber and Rosendahl (2022) (details are given in Bergfeld et al. (2023a)). A best fit of the measured and modeled unsupported length was done to account for possible temporal variations of the weak layer properties during the course of the season as well as spatial variations within the field test site. The obtained values are shown in Figure 9 along with the curves.

For six long PST experiments the observed unsupported lengths and the ERR are shown in Figure 9. In all experiments the onset of unstable crack propagation is observed at critical crack lengths that are still in stage A according to the present model. This result is consistent with Bergfeld et al. (2023a) where no such touchdown is reported. The corresponding critical energy release rates take values of  $0.43 \text{ J/m}^2$  to  $2.93 \text{ J/m}^2$ .

The model results for the considered experimental configurations show the characteristic curves of unsupported length with its maximum at the transition from stage B to C and of the ERR with the local maximum at first contact and the plateau for steady state. The values of the critical ERR (fracture toughness) that are obtained for the critical crack length are given in Table 3 along with the ERR during the steady state crack propagation. The ratio of these ERR values lies between 0.016 to 0.118 for the PST experiments which resulted in full propagation throughout the beam (END). For the experiments on January 11 and March 13 where crack arrest (ARR) was observed, the ratio takes values of 0.257 and 0.328. This ratio may be a decisive factor to understand the behavior of dynamic crack propagation and conditions of crack arrest in dry-snow slab avalanches. However, only the PST experiments of January 30 and March 13 are long enough (9.0 m and 7.7 m, respectively) to exhibit a distinct and extended plateau of the ERR in stage C.



For the experiments with crack arrest, the model predicts a touchdown of the slab (transition from stage B to C). In the crack  
370 arrest case of the Jan 11 experiment, the crack arrest occurred at around 60cm after the touchdown. In the other experiment  
with crack arrest (Mar 13), the arrest length coincides well with the modelled touchdown length.

**The touchdown has a strong effect on the ERR in PSTs.** The decrease in energy release rate after the transition from A to  
B is assumed to be one of the primary factors driving crack arrest. As expected the model also shows that there is plateau  
value of the ERR, when full touchdown has developed and no edge effects come into play (yet). The ERR value of this plateau  
375 is definitely the most relevant for propagation of weak layer failure over a long distance. The results indicate that the PST  
experiments must be done with very long PSTs to obtain a distinct plateau. This finding coincides with the findings of Bergfeld  
et al. (2023a), as they report that PSTs must be longer than one touchdown distance to study whether a crack can propagate  
a long distance. Near the end of the PST the ERR rises again. Also because of this effect PSTs are required to be sufficiently  
long to obtain reliable results (Van Herwijnen et al., 2010; van Herwijnen and Birkeland, 2014). Bair et al. (2014) studied this  
380 at hand of PSTs of different length and also found that for steady state very long PSTs must be studied. In their study they  
observed that with increasing length of the PSTs less full propagation results occurred.

The ability of a weak layer crack to propagate over a large area is likely determined by the steady-state ERR in C and its  
ability to pass through the local minimum of the ERR in B (Rosendahl et al., 2019b; Bergfeld et al., 2023b). Another possible  
factor limiting crack propagation within a slope could be slab fracture that limits the bending deformation (Schweizer et al.,  
385 2014b; Gaume et al., 2015a).

## 5 Conclusion

We have provided an efficient solution approach for the non-linear problem of slab touchdown during propagation saw test  
experiments, that are used to characterize fracture mechanical properties of weak layers. The solution is highly efficient and  
shows very good agreement with numerical reference models (Finite Element and Discrete Element Methods). In addition  
390 experimentally measured touchdown lengths from up to 9m long PSTs are reproduced well. Across the provided parameter  
study, all modelled slab-weak layer configurations have consistently led to i) a local maximum of the ERR when slab comes  
into contact with the substrate (transition from stage A to B) and ii) a maximum of the touchdown length at the transition from  
B to C closely before the steady state touchdown length reached in stage C. At this stage the touchdown length is not coupled to  
crack length anymore and the mechanical deformation of the slab-weak layer system is translationally invariant with respect to  
395 the crack tip. Hence, in stage C also the ERR reaches a steady state value which is lower than the local maximum at transition  
from A to B. The behaviour of the ERR with crack length has practical implications. PST experiments can result in crack  
arrest after a couple of metres Bergfeld et al. (2023b). After the local maximum the reduced ERR in the steady state (stage C)  
provides a reasonable explanation for crack arrest phenomena after initially unstable cracking. This finding also suggests that  
large-scale crack propagation, a necessity of avalanches, is more likely for a snowpack with high steady state ERR. If the ERR  
400 at the onset of crack propagation, namely the fracture toughness  $\mathcal{G}_c$  of the weak layer, is close or even higher than the steady

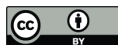

state ERR toughness  $\mathcal{G}_s$ , this suggests that large-scale crack propagation is more unlikely. As shown in Table 3, the quotient of both  $\mathcal{G}_c/\mathcal{G}_s$  is therefore a reasonable metric to map the propensity for wide-spread crack propagation of a given snowpack/PST.

Overall, the work provides important insights into the physical processes during onset of crack propagation and potential crack arrest in PST experiments.

405 *Code availability.* The present model is made publicly available as Python code under <https://github.com/2phi/weac>.

*Author contributions.* PW and PLR conceived the study. JS, PW, and PLR developed the theoretical framework. GB, BB, and AH collected the field data. JS, FR and GB developed the reference models. All authors contributed to the interpretation of the results and writing of the manuscript.

*Competing interests.* The authors declare that they have no conflict of interest.

410 *Acknowledgements.* This work was funded by Deutsche Forschungsgemeinschaft (DFG, German Research Foundation) under grant no. 460195514 and the Swiss National Science Foundation (grant no. 200021\_169424 and 200021L\_201071). We used [deepl.com/write](https://deepl.com/write) to improve ease of reading and comprehension. We acknowledge support by the German Research Foundation and the Open Access Publishing Fund of Technische Universität Darmstadt.



## References

- 415 Bair, E. H., Simenhois, R., Van Herwijnen, A., and Birkeland, K.: The influence of edge effects on crack propagation in snow stability tests, *The Cryosphere*, 8, 1407–1418, 2014.
- Benedetti, L., Gaume, J., and Fischer, J.-T.: A mechanically-based model of snow slab and weak layer fracture in the Propagation Saw Test, *International Journal of Solids and Structures*, 158, 1–20, <https://doi.org/10.1016/j.ijsolstr.2017.12.033>, <https://linkinghub.elsevier.com/retrieve/pii/S0020768317305358>, 2019.
- 420 Bergfeld, B., van Herwijnen, A., Reuter, B., Bobillier, G., Dual, J., and Schweizer, J.: Dynamic crack propagation in weak snowpack layers: insights from high-resolution, high-speed photography, *The Cryosphere*, 15, 3539–3553, <https://doi.org/10.5194/tc-15-3539-2021>, 2021.
- Bergfeld, B., van Herwijnen, A., Bobillier, G., Rosendahl, P. L., Weißgraeber, P., Adam, V., Dual, J., and Schweizer, J.: Temporal evolution of crack propagation characteristics in a weak snowpack layer: conditions of crack arrest and sustained propagation, *Natural Hazards and Earth System Sciences*, 23, 293–315, <https://doi.org/10.5194/nhess-23-293-2023>, 2023a.
- 425 Bergfeld, B., van Herwijnen, A., and Schweizer, J.: Time series data on dynamic crack propagation in long propagation saw tests, *EnviDat*, <https://doi.org/10.16904/envidat.365>, 2023b.
- Birkeland, K., van Herwijnen, A., Knoff, E., Staples, M., Bair, E., and Simenhois, R.: The role of slabs and weak layers in fracture arrest, in: *Proceedings ISSW*, pp. 156–168, 2014.
- Birkeland, K. W., van Herwijnen, A., Reuter, B., and Bergfeld, B.: Temporal changes in the mechanical properties of snow related to crack propagation after loading, *Cold Regions Science and Technology*, 159, 142–152, 2019.
- 430 Bobillier, G., Bergfeld, B., Dual, J., Gaume, J., van Herwijnen, A., and Schweizer, J.: Micro-mechanical insights into the dynamics of crack propagation in snow fracture experiments, *Scientific Reports*, 11, 11 711, <https://doi.org/10.1038/s41598-021-90910-3>, 2021.
- Bobillier, G., Bergfeld, B., Dual, J., Gaume, J., van Herwijnen, A., and Schweizer, J.: Numerical investigation of crack propagation regimes in snow fracture experiments, *Granular Matter*, 26, 1–15, 2024.
- 435 Föhn, P. M. B.: Simulation of surface-hoar layers for snow-cover models, *Annals of Glaciology*, 32, 19–26, <https://doi.org/10.3189/172756401781819490>, 2001.
- Freund, L. B.: *Dynamic Fracture Mechanics*, Cambridge University Press, Cambridge, <https://doi.org/10.1017/CBO9780511546761>, 1990.
- Gaume, J., Chambon, G., Eckert, N., Naaim, M., and Schweizer, J.: Influence of weak layer heterogeneity and slab properties on slab tensile failure propensity and avalanche release area, *The Cryosphere*, 9, 795–804, 2015a.
- 440 Gaume, J., van Herwijnen, A., Chambon, G., Birkeland, K. W., and Schweizer, J.: Modeling of crack propagation in weak snowpack layers using the discrete element method, *The Cryosphere*, 9, 1915–1932, <https://doi.org/10.5194/tc-9-1915-2015>, 2015b.
- Gauthier, D. and Jamieson, B.: Towards a field test for fracture propagation propensity in weak snowpack layers, *Journal of Glaciology*, 52, 164–168, <https://doi.org/10.3189/172756506781828962>, 2006.
- Gauthier, D. and Jamieson, B.: Evaluation of a prototype field test for fracture and failure propagation propensity in weak snowpack layers, *Cold Regions Science and Technology*, 51, 87–97, <https://doi.org/10.1016/j.coldregions.2007.04.005>, <http://linkinghub.elsevier.com/retrieve/pii/S0165232X07000821>, 2008.
- Gerling, B., Löwe, H., and van Herwijnen, A.: Measuring the Elastic Modulus of Snow, *Geophysical Research Letters*, 44, 11,088–11,096, <https://doi.org/10.1002/2017GL075110>, 2017.
- Goland, M. and Reissner, E.: The stresses in cemented joints, *Journal of Applied Mechanics*, 11, A17–A27, 1944.



- 450 Habermann, M., Schweizer, J., and Jamieson, B.: Influence of snowpack layering on human-triggered snow slab avalanche release, *Cold Regions Science and Technology*, 54, 176–182, <https://doi.org/10.1016/j.coldregions.2008.05.003>, 2008.
- Heierli, J.: Solitary fracture waves in metastable snow stratifications, *Journal of Geophysical Research*, 110, F02 008, <https://doi.org/10.1029/2004JF000178>, 2005.
- Heierli, J. and Zaiser, M.: Failure initiation in snow stratifications containing weak layers: Nucleation of whumpfs and slab avalanches, *Cold Regions Science and Technology*, 52, 385–400, <https://doi.org/10.1016/j.coldregions.2007.02.007>, 2008.
- 455 Heierli, J., Gumbsch, P., and Zaiser, M.: Anticrack nucleation as triggering mechanism for snow slab avalanches., *Science*, 321, 240–243, <https://doi.org/10.1126/science.1153948>, 2008.
- Jamieson, B. and Schweizer, J.: Texture and strength changes of buried surface-hoar layers with implications for dry snow-slab avalanche release, *Journal of Glaciology*, 46, 151–160, <https://doi.org/10.3189/172756500781833278>, 2000.
- 460 Krenk, S.: Energy release rate of symmetric adhesive joints, *Engineering Fracture Mechanics*, 43, 549–559, [https://doi.org/10.1016/0013-7944\(92\)90198-N](https://doi.org/10.1016/0013-7944(92)90198-N), 1992.
- Lenci, S.: Analysis of a crack at a weak interface, *International Journal of Fracture*, 108, 275–290, <https://doi.org/10.1023/A:1011041409243>, 2001.
- Mellor, M. and Cole, D. M.: Stress/strain/time relations for ice under uniaxial compression, *Cold Regions Science and Technology*, 6, 207–  
465 230, [https://doi.org/10.1016/0165-232X\(83\)90043-5](https://doi.org/10.1016/0165-232X(83)90043-5), 1983.
- Moslet, P.: Field testing of uniaxial compression strength of columnar sea ice, *Cold Regions Science and Technology*, 48, 1–14, <https://doi.org/10.1016/j.coldregions.2006.08.025>, 2007.
- Northwood, T. D.: Sonic determination of the elastic properties of ice, *Canadian Journal of Research*, 25a, 88–95, <https://doi.org/10.1139/cjr47a-011>, 1947.
- 470 Reddy, J. N.: *Mechanics of Laminated Composite Plates and Shells: Theory and Analysis*, CRC Press, Boca Raton, 2nd edn., 2003.
- Reuter, B. and Schweizer, J.: The effect of surface warming on slab stiffness and the fracture behavior of snow, *Cold Regions Science and Technology*, 83–84, 30–36, <https://doi.org/10.1016/j.coldregions.2012.06.001>, 2012.
- Rosendahl, P. L. and Weißgraeber, P.: Modeling snow slab avalanches caused by weak-layer failure – Part 1: Slabs on compliant and collapsible weak layers, *The Cryosphere*, 14, 115–130, <https://doi.org/10.5194/tc-14-115-2020>, <https://www.the-cryosphere.net/14/115/2020/>,  
475 2020a.
- Rosendahl, P. L. and Weißgraeber, P.: Modeling snow slab avalanches caused by weak-layer failure–Part 2: Coupled mixed-mode criterion forskier-triggered anticracks, *The Cryosphere*, pp. 131–145, 2020b.
- Rosendahl, P. L., Staudt, Y., Odenbreit, C., Schneider, J., and Becker, W.: Measuring mode I fracture properties of thick-layered structural silicone sealants, *International Journal of Adhesion and Adhesives*, 91, 64–71, <https://doi.org/10.1016/j.ijadhadh.2019.02.012>, 2019a.
- 480 Rosendahl, P. L., Staudt, Y., Schneider, A. P., Schneider, J., and Becker, W.: Nonlinear elastic finite fracture mechanics: Modeling mixed-mode crack nucleation in structural glazing silicone sealants, *Materials & Design*, 182, 108 057, <https://doi.org/10.1016/j.matdes.2019.108057>, 2019b.
- Ross, C. K. H. and Jamieson, B.: The propagation saw test: slope scale validation and alternative test methods, *Journal of Glaciology*, 58, 407–416, <https://doi.org/10.3189/2012JoG11J192>, 2012.
- 485 Schweizer, J. and Jamieson, J. B.: Snowpack properties for snow profile analysis, *Cold Regions Science and Technology*, 37, 233–241, 2003.
- Schweizer, J. and Wiesinger, T.: Snow profile interpretation fro stability evaluation, *Cold Regions Science and Technology*, 33, 179–188, [https://doi.org/10.1016/S0165-232X\(01\)00036-2](https://doi.org/10.1016/S0165-232X(01)00036-2), 2001.



- Schweizer, J., Jamieson, B., and Schneebeli, M.: Snow avalanche formation, *Reviews of Geophysics*, 41, 1016, <https://doi.org/10.1029/2002RG000123>, 2003.
- 490 Schweizer, J., van Herwijnen, A., and Reuter, B.: Measurements of weak layer fracture energy, *Cold Regions Science and Technology*, 69, 139–144, <https://doi.org/10.1016/j.coldregions.2011.06.004>, 2011.
- Schweizer, J., Reuter, B., van Herwijnen, A., Gauthier, D., and Jamieson, B.: On how the tensile strength of the slab affects crack propagation propensity, in: *Proceedings, International Snow Science Workshop, Banff*, pp. 164–168, 2014a.
- Schweizer, J., Reuter, B., van Herwijnen, A., Jamieson, J., and Gauthier, D.: On how the tensile strength of the slab affects crack propagation propensity, in: *Proceedings ISSW*, pp. 164–168, 2014b.
- 495 Schweizer, J., Reuter, B., van Herwijnen, A., Richter, B., and Gaume, J.: Temporal evolution of crack propagation propensity in snow in relation to slab and weak layer properties, *The Cryosphere*, 10, 2637–2653, <https://doi.org/10.5194/tc-10-2637-2016>, <http://www.the-cryosphere.net/10/2637/2016/>, 2016.
- Sigrist, C., Schweizer, J., Schindler, H.-J., and Dual, J.: The energy release rate of mode II fractures in layered snow samples, *International Journal of Fracture*, 139, 461–475, <https://doi.org/10.1007/s10704-006-6580-9>, <http://link.springer.com/10.1007/s10704-006-6580-9>, 2006.
- 500 Simenhois, R. and Birkeland, K. W.: The Extended Column Test: Test effectiveness, spatial variability, and comparison with the Propagation Saw Test, *Cold Regions Science and Technology*, 59, 210–216, <https://doi.org/10.1016/j.coldregions.2009.04.001>, 2009.
- Siron, M., Trottet, B., and Gaume, J.: A theoretical framework for dynamic anticrack and supershear propagation in snow slab avalanches, *Journal of the Mechanics and Physics of Solids*, 181, 105 428, 2023.
- 505 Stein, N., Weißgraeber, P., and Becker, W.: A model for brittle failure in adhesive lap joints of arbitrary joint configuration, *Composite Structures*, 133, 707–718, <https://doi.org/10.1016/j.compstruct.2015.07.100>, 2015.
- Thumlert, S. and Jamieson, B.: Stress measurements in the snow cover below localized dynamic loads, *Cold Regions Science and Technology*, 106–107, 28–35, <https://doi.org/10.1016/j.coldregions.2014.06.002>, 2014.
- 510 van Herwijnen, A. and Birkeland, K.: Measurements of snow slab displacement in Extended Column Tests and comparison with Propagation Saw Tests, *Cold Regions Science and Technology*, 97, 97–103, 2014.
- van Herwijnen, A. and Jamieson, B.: High-speed photography of fractures in weak snowpack layers, *Cold Regions Science and Technology*, 43, 71–82, <https://doi.org/10.1016/j.coldregions.2005.05.005>, 2005.
- Van Herwijnen, A. and Jamieson, B.: High-speed photography of fractures in weak snowpack layers, *Cold Regions Science and Technology*, 43, 71–82, 2005.
- 515 van Herwijnen, A. and Jamieson, B.: Snowpack Properties Associated with Fracture Initiation and Propagation Resulting in Skier-Triggered Dry Snow Slab Avalanches, *Cold Regions Science and Technology*, 50, 13–22, 2007.
- Van Herwijnen, A., Schweizer, J., and Heierli, J.: Measurement of the deformation field associated with fracture propagation in weak snowpack layers, *Journal of Geophysical Research: Earth Surface*, 115, 2010.
- 520 van Herwijnen, A., Gaume, J., Bair, E. H., Reuter, B., Birkeland, K. W., and Schweizer, J.: Estimating the effective elastic modulus and specific fracture energy of snowpack layers from field experiments, *Journal of Glaciology*, 62, 997–1007, <https://doi.org/10.1017/jog.2016.90>, 2016.
- Weißgraeber, P. and Rosendahl, P. L.: A Closed-Form Model for Layered Snow Slabs, Preprint, 2022.
- Weißgraeber, P. and Rosendahl, P. L.: A closed-form model for layered snow slabs, *The Cryosphere*, 17, 1475–1496, <https://doi.org/10.5194/tc-17-1475-2023>, <https://tc.copernicus.org/articles/17/1475/2023/>, 2023.
- 525
